# Supplementary material
Source: PubMed Central journal article supplement (PMC3358577)

# Supplemental Figure 1

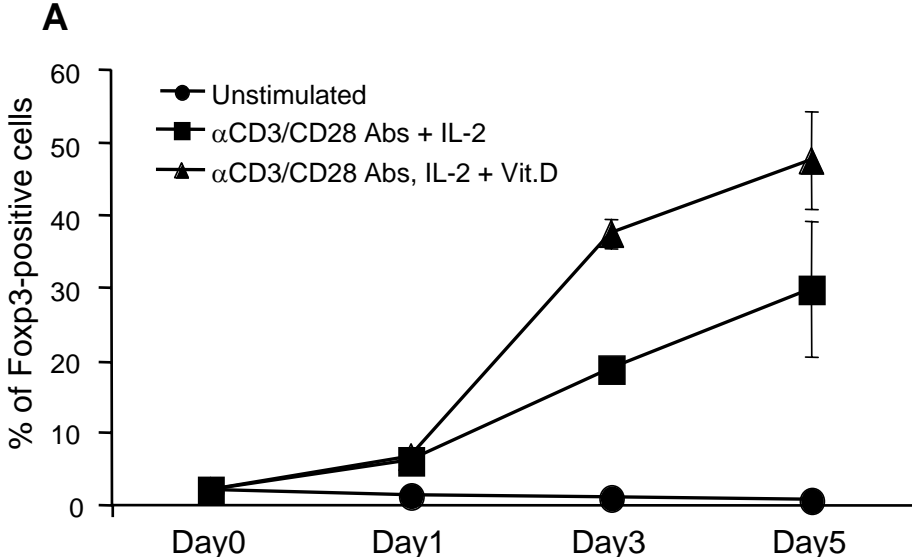

**Supplemental Figure 1. Expression of FOXP3 and vitamin D receptor by human CD25<sup>+</sup>CD4<sup>+</sup>T cells in response to anti-CD3/CD28 Abs, IL-2 and 1,25(OH)<sub>2</sub> vitamin D3.** Human CD25<sup>+</sup>CD4<sup>+</sup> T cells were purified from peripheral blood mononuclear cells. Cells were incubated for indicated times with or without anti-CD3/CD28 Abs and IL-2 (25 ng/ml) in the presence or absence of 1,25(OH)<sub>2</sub> vitamin D3 (Vit D, 10 nM). (A) FOXP3 expression was determined by intracellular flow cytometric analysis. Data represent the mean  $\pm$  SEM from 3 independent experiments. (B) Expression of vitamin D receptor (VDR) was determined by Western blot analysis. Representative data from 3 independent experiments.

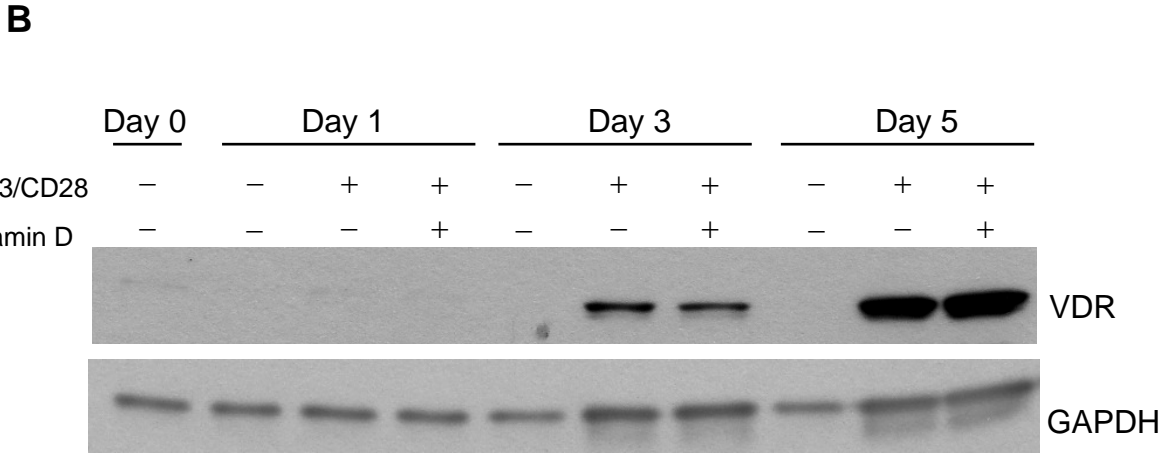

Supplement: NIHMS367769-supplement-1.pdf [file NIHMS367769-supplement-1.pdf]
